# Supplementary material for: Investigating ground-level ozone pollution in semi-arid and arid regions of Arizona using WRF-Chem v4.4 modeling
Source: Copernicus journal article supplement (doi:10.5194/gmd-17-4331-2024), 2024-05-24
Supplement: Supplementary file 1 [file gmd-17-4331-2024-supplement.pdf]

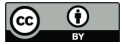

*Supplement of*

## **Investigating ground-level ozone pollution in semi-arid and arid regions of Arizona using WRF-Chem v4.4 modeling**

**Yafang Guo et al.**

*Correspondence to:* Yafang Guo (guoy1@arizona.edu)

The copyright of individual parts of the supplement might differ from the article licence.

**Table S1. Ozone design values for the Phoenix-Mesa metropolitan area for the last two decades. Note: there were two concurred exceptional events in the 2017 design value (20 June 2015 and 7 July 2017). Without that the 2017 design value is 75 ppb.**

| Design Value years | Design Value (ppm) | NAAQS Value (ppm) | NAAQS Year |
|--------------------|--------------------|-------------------|------------|
| 2020-2022          | 0.081              | 0.070             | 2015       |
| 2019-2021          | 0.080              | 0.070             | 2015       |
| 2018-2020          | 0.079              | 0.070             | 2015       |
| 2017-2019          | 0.077              | 0.070             | 2015       |
| 2016-2018          | 0.077              | 0.070             | 2015       |
| 2015-2017          | 0.076              | 0.070             | 2015       |
| 2014-2016          | 0.077              | 0.075             | 2008       |
| 2013-2015          | 0.076              | 0.075             | 2008       |
| 2012-2014          | 0.078              | 0.075             | 2008       |
| 2011-2013          | 0.081              | 0.075             | 2008       |
| 2010-2012          | 0.081              | 0.075             | 2008       |
| 2009-2011          | 0.077              | 0.075             | 2008       |
| 2008-2010          | 0.077              | 0.080             | 1997       |
| 2007-2009          | 0.076              | 0.080             | 1997       |
| 2006-2008          | 0.081              | 0.080             | 1997       |
| 2005-2007          | 0.083              | 0.080             | 1997       |
| 2004-2006          | 0.083              | 0.080             | 1997       |
| 2003-2005          | 0.084              | 0.080             | 1997       |

**Table S2. EPA AQS sites selected for WRF-Chem evaluations.**

| City    | AQS Site Number | Site Name              | Latitude  | Longitude   | Measurements                         |
|---------|-----------------|------------------------|-----------|-------------|--------------------------------------|
| Phoenix | 40130019        | West Phoenix           | 33.48378  | -112.14256  | O <sub>3</sub> , CO, NO <sub>x</sub> |
| Phoenix | 40139997        | JLG Supersite          | 33.503833 | -112.095767 | O <sub>3</sub> , CO, NO <sub>x</sub> |
| Phoenix | 40133002        | Central Phoenix        | 33.45797  | -112.04659  | O <sub>3</sub> , CO, NO <sub>x</sub> |
| Phoenix | 40134003        | South Phoenix          | 33.40314  | -112.07526  | O <sub>3</sub> , CO                  |
| Phoenix | 40133003        | South Scottsdale       | 33.47968  | -111.91721  | O <sub>3</sub> , CO, NO <sub>2</sub> |
| Phoenix | 40134005        | Tempe                  | 33.41123  | -111.93471  | O <sub>3</sub> , CO                  |
| Phoenix | 40131003        | Mesa                   | 33.41018  | -111.86536  | O <sub>3</sub> , CO                  |
| Phoenix | 40137022        | Lehi (Fire Station)    | 33.474609 | -111.805769 | O <sub>3</sub>                       |
| Phoenix | 40137024        | Salt River High School | 33.508125 | -111.83852  | O <sub>3</sub>                       |
| Phoenix | 40137020        | Senior Center          | 33.488131 | -111.855443 | O <sub>3</sub>                       |
| Tucson  | 40191028        | Children's Park        | 32.29515  | -110.9823   | O <sub>3</sub> , CO, NO <sub>2</sub> |
| Tucson  | 40191011        | 22nd and Craycroft     | 32.204411 | -110.878067 | O <sub>3</sub> , CO, NO <sub>2</sub> |
| Tucson  | 40191032        | Rose Elementary        | 32.172995 | -110.980134 | O <sub>3</sub>                       |

|        |           |                            |           |             |                |
|--------|-----------|----------------------------|-----------|-------------|----------------|
| Tucson | 40190021  | Saguaro National Park East | 32.174538 | -110.737116 | O <sub>3</sub> |
| Tucson | 40191021  | Cherry and Glenn           | 34.403052 | -119.457914 | CO             |
| Tucson | 40191034  | Coachline                  | 32.38082  | -111.12716  | O <sub>3</sub> |
| Tucson | 40191018  | Tangerine                  | 32.42526  | -111.064    | O <sub>3</sub> |
| Yuma   | 40278011  | Yuma Supersite             | 32.690278 | -114.61444  | O <sub>3</sub> |
| Yuma   | 800268012 | San Luis Rio Colorado Well | 32.466389 | -114.768611 | O <sub>3</sub> |

**Table S3. Evaluation of MDA8 O<sub>3</sub> over Phoenix, Tucson, and Yuma for individual years for WRF-Chem simulations. The datasets for evaluation include AQS observations, CMAQ reanalysis (2017-2018), and ADEQ forecasts (2019-2021).**

|                       | Phoenix |       |       |       |       | Tucson |      |       |       |       | Yuma |      |      |      |      |
|-----------------------|---------|-------|-------|-------|-------|--------|------|-------|-------|-------|------|------|------|------|------|
| Year                  | 2017    | 2018  | 2019  | 2020  | 2021  | 2017   | 2018 | 2019  | 2020  | 2021  | 2017 | 2018 | 2019 | 2020 | 2021 |
| AQS                   | 67.9    | 66.6  | 64.1  | 62.0  | 67.8  | 60.1   | 54.9 | 54.8  | 54.6  | 57.2  | 54.3 | 53.8 | 56.1 | 48.2 | 52.1 |
| WRF<br>Chem           | 66.8    | 62.6  | 58.9  | 59.2  | 62.6  | 60.2   | 55.3 | 52.8  | 54.3  | 56.8  | 60.5 | 61.8 | 58.5 | 57.8 | 57.7 |
| CMAQ<br>/ADEQ         | 58.4    | 57.5  | 67.7  | 65.1  | 68.5  | 53.7   | 51.1 | 55.6  | 55.6  | 57.1  | 64.1 | 64.7 | 53.8 | 50.8 | 50.4 |
| R<br>(W)              | 0.81    | 0.69  | 0.61  | 0.56  | 0.62  | 0.79   | 0.70 | 0.68  | 0.68  | 0.26  | 0.85 | 0.50 | 0.72 | 0.40 | 0.83 |
| R<br>(C/A)            | 0.87    | 0.66  | 0.44  | 0.66  | 0.19  | 0.71   | 0.78 | 0.55  | 0.77  | 0.22  | 0.44 | 0.30 | 0.82 | 0.31 | 0.71 |
| MB<br>(W)             | -1.09   | -3.94 | -5.21 | -2.76 | -5.16 | 0.14   | 0.37 | -1.98 | -0.35 | -0.40 | 6.16 | 7.95 | 2.32 | 9.62 | 5.62 |
| MB<br>(C/A)           | -9.5    | -9.1  | 3.1   | 1.2   | 0.0   | -6.4   | -3.8 | 0.7   | -1.1  | -0.5  | 9.8  | 10.9 | -2.7 | 2.8  | 0.6  |
| ME<br>(W)             | 6.3     | 6.6   | 7.0   | 6.6   | 8.1   | 4.7    | 4.7  | 4.3   | 4.8   | 7.0   | 9.1  | 11.8 | 5.5  | 10.1 | 6.8  |
| ME<br>(C/A)           | 9.9     | 10.1  | 5.1   | 4.2   | 9.9   | 7.4    | 5.1  | 3.9   | 4.0   | 6.0   | 13.8 | 14.2 | 4.1  | 6.8  | 6.8  |
| RMSE<br>(W)           | 7.6     | 8.5   | 8.3   | 8.3   | 10.4  | 5.7    | 5.9  | 4.9   | 6.2   | 9.0   | 11.9 | 15.5 | 6.6  | 13.2 | 9.5  |
| RMSE<br>(C/A)         | 11.1    | 12.7  | 7.4   | 5.4   | 12.6  | 8.8    | 6.6  | 4.9   | 4.9   | 6.9   | 16.6 | 17.5 | 5.5  | 8.0  | 8.3  |
| NMB<br>(W,<br>100%)   | -1.6    | -5.9  | -8.1  | -4.5  | -7.6  | 0.2    | 0.7  | -3.6  | -0.6  | -0.7  | 11.3 | 14.8 | 4.1  | 20.0 | 10.8 |
| NMB<br>(C/A,<br>100%) | -14.0   | -13.6 | 4.8   | 1.9   | -0.1  | -10.7  | -6.9 | 1.3   | -2.0  | -0.8  | 18.0 | 20.2 | -4.9 | 5.8  | 1.1  |
| NME<br>(W,<br>100%)   | 9.2     | 10.0  | 10.8  | 10.7  | 12.0  | 7.8    | 8.6  | 7.8   | 8.7   | 12.3  | 16.8 | 22.0 | 9.8  | 21.0 | 13.0 |
| NME<br>(C/A,<br>100%) | 14.6    | 15.2  | 8.0   | 6.7   | 14.6  | 12.3   | 9.3  | 7.2   | 7.3   | 10.6  | 25.3 | 26.3 | 7.3  | 14.2 | 13.0 |
| MNB<br>(W,<br>100%)   | -2.0    | -6.0  | -7.7  | -4.3  | -7.0  | 0.3    | 1.0  | -3.2  | 0.2   | 0.0   | 11.6 | 18.5 | 5.0  | 21.3 | 12.3 |
| MNB<br>(C/A,<br>100%) | -14.5   | -13.9 | 5.9   | 2.1   | 1.8   | -10.5  | -7.1 | 2.1   | -1.5  | 0.1   | 25.8 | 25.9 | -4.4 | 7.8  | 4.1  |
| MNE<br>(W,<br>100%)   | 9.4     | 10.0  | 11.0  | 10.6  | 11.4  | 7.8    | 8.7  | 8.0   | 8.7   | 12.5  | 16.9 | 24.6 | 10.1 | 22.1 | 14.2 |
| MNE<br>(C/A,<br>100%) | 14.9    | 15.3  | 8.9   | 6.6   | 13.7  | 12.2   | 9.4  | 7.6   | 6.9   | 10.7  | 31.0 | 30.5 | 7.0  | 14.9 | 14.1 |
| FB<br>(W,<br>100%)    | -2.7    | -6.9  | -8.6  | -5.3  | -8.0  | -0.2   | 0.4  | -3.6  | -0.4  | -1.3  | 9.5  | 14.2 | 4.3  | 17.9 | 10.5 |
| FB<br>(C/A,<br>100%)  | -16.1   | -16.1 | 5.0   | 1.8   | 0.4   | -11.7  | -7.9 | 1.6   | -1.8  | -0.7  | 19.3 | 19.7 | -4.8 | 6.4  | 2.6  |
| FE<br>(W,<br>100%)    | 9.6     | 10.7  | 11.7  | 11.3  | 12.2  | 7.7    | 8.8  | 8.1   | 8.7   | 12.7  | 15.3 | 21.0 | 9.7  | 18.8 | 12.4 |
| FE<br>(C/A,<br>100%)  | 16.5    | 17.5  | 8.1   | 6.4   | 13.9  | 13.2   | 10.2 | 7.3   | 7.0   | 10.7  | 24.9 | 24.6 | 7.3  | 14.1 | 13.4 |

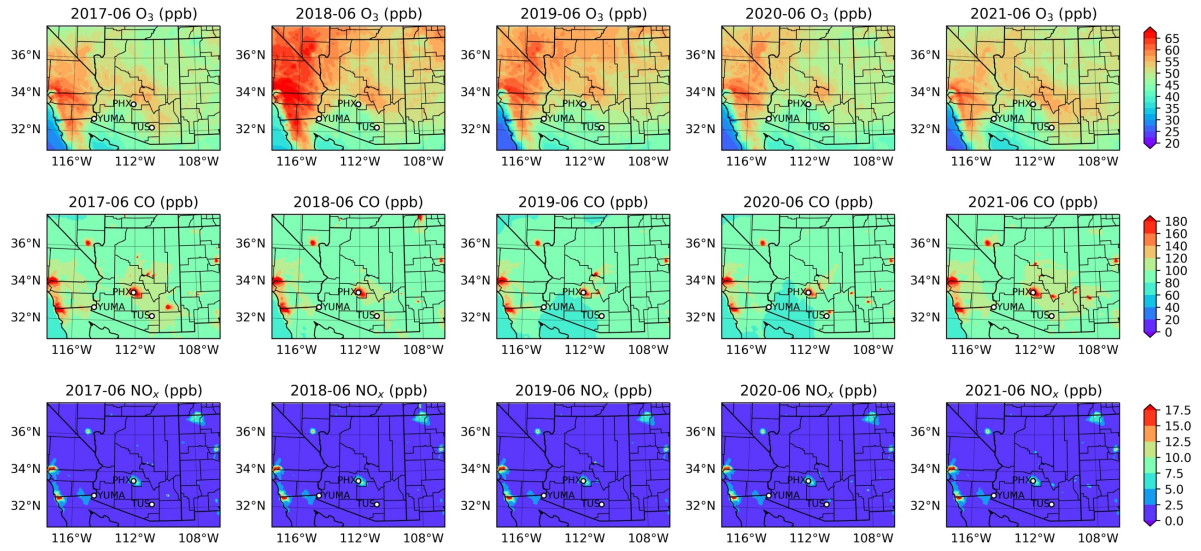

**Figure S1. June monthly mean  $O_3$ ,  $CO$ , and  $NO_x$  from WRF-Chem simulations for 2017 to 2021.**

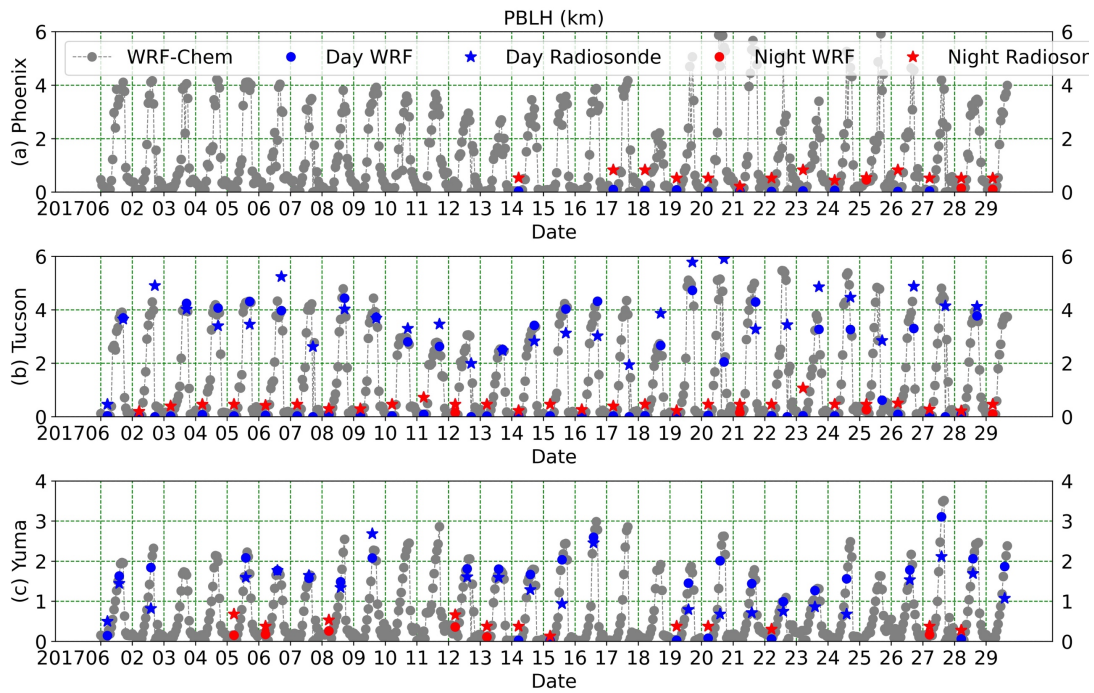

**Figure S2. Radiosonde observed and WRF-Chem simulated PBLH in June**

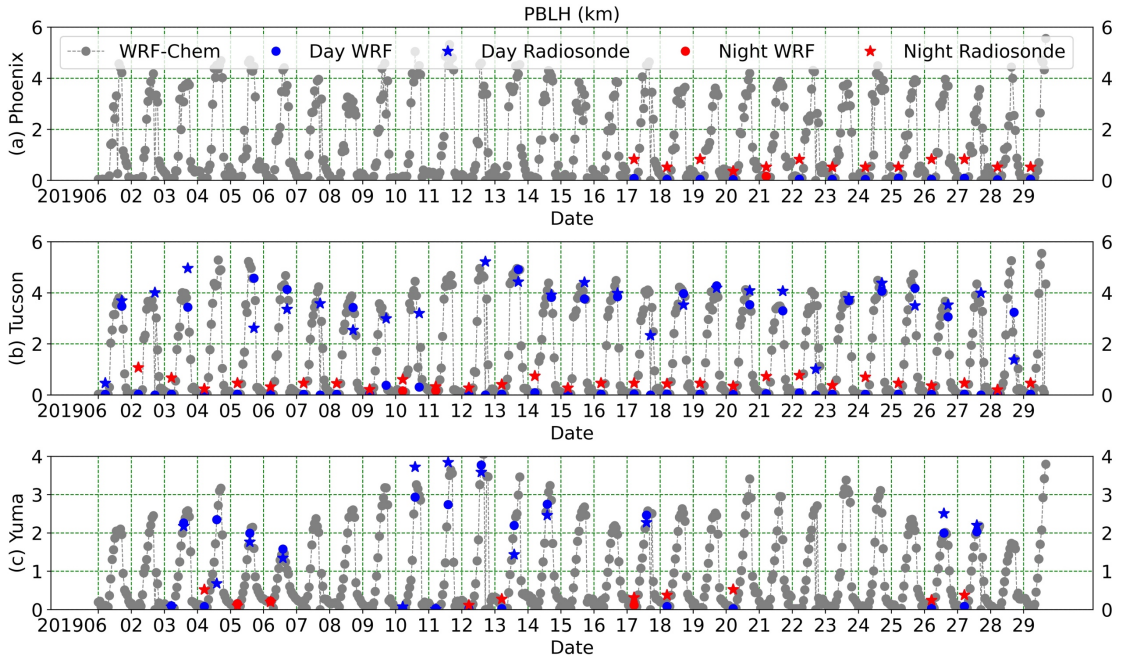

**Figure S3. Radiosonde observed and WRF-Chem simulated PBLH in June 2019.**

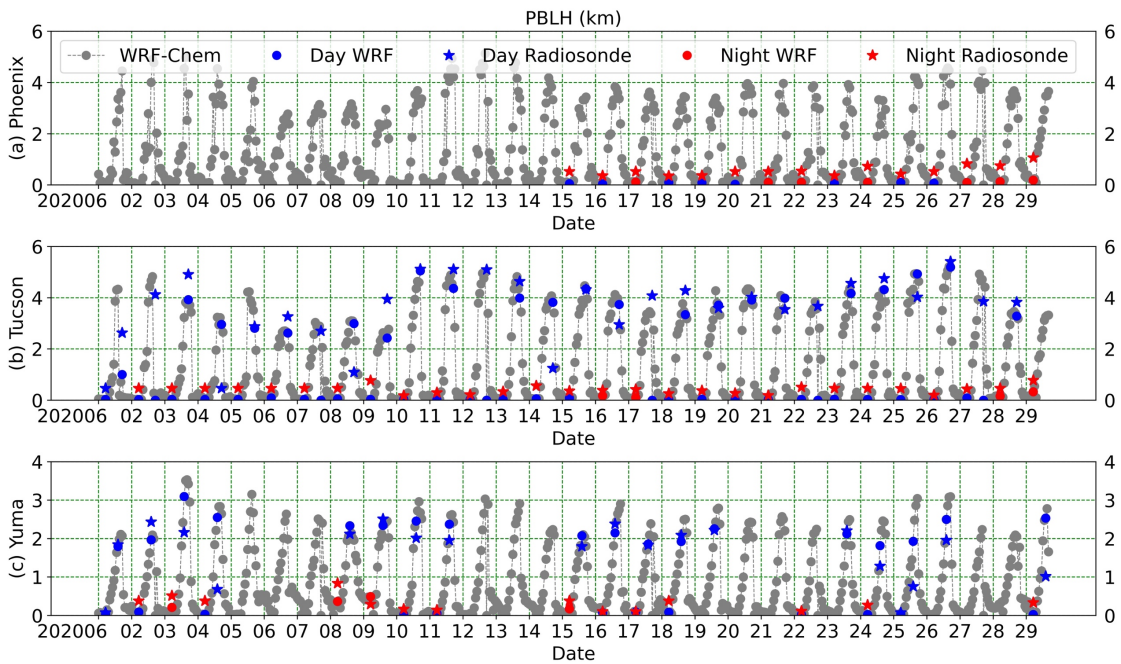

**Figure S4. Radiosonde observed and WRF-Chem simulated PBLH in June 2020.**

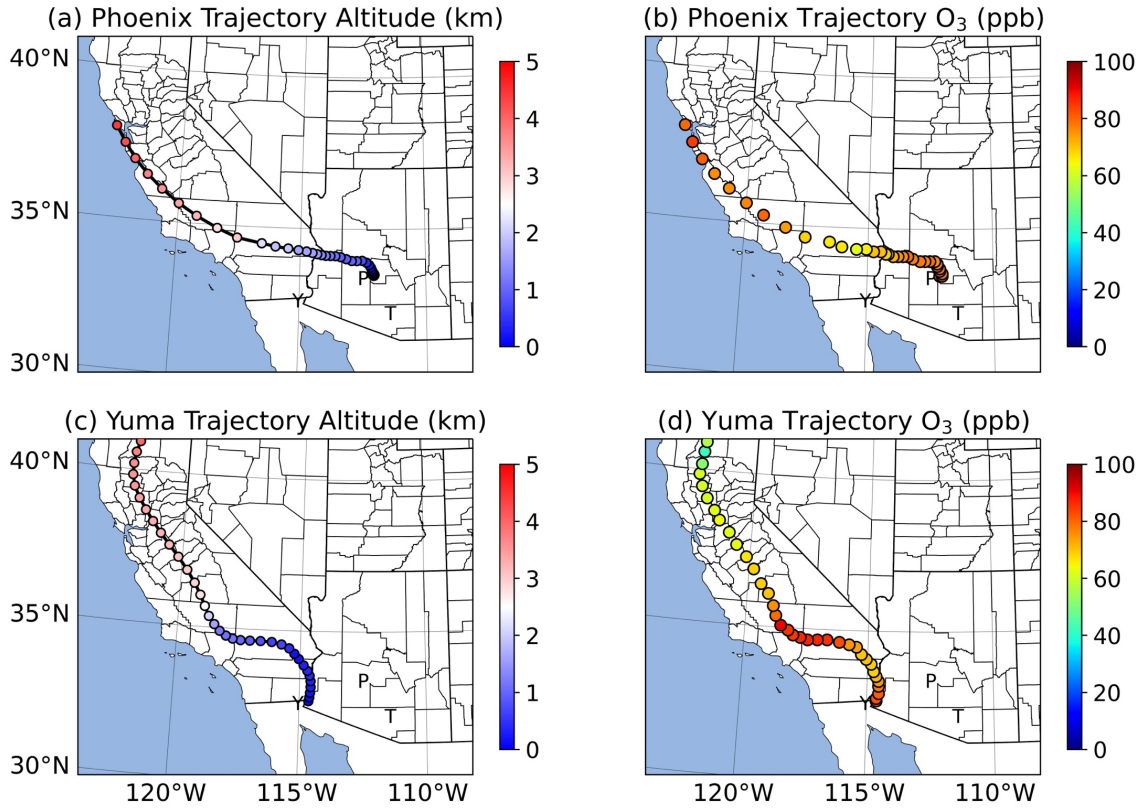

**Figure S5. 48-hour HYSPLIT back trajectories for the observed O<sub>3</sub> exceedance event on 13 June 2017 in both (a) Phoenix and (c) Yuma, and the corresponding O<sub>3</sub> concentrations along the trajectories.**
